# Supplementary material for: Multiwall Carbon Nanotube-Induced Apoptosis and Antioxidant Gene Expression in the Gills, Liver, and Intestine ofOryzias latipes
Source: Hindawi journal article supplement (doi:10.1155/2015/485343), 2015-01-01

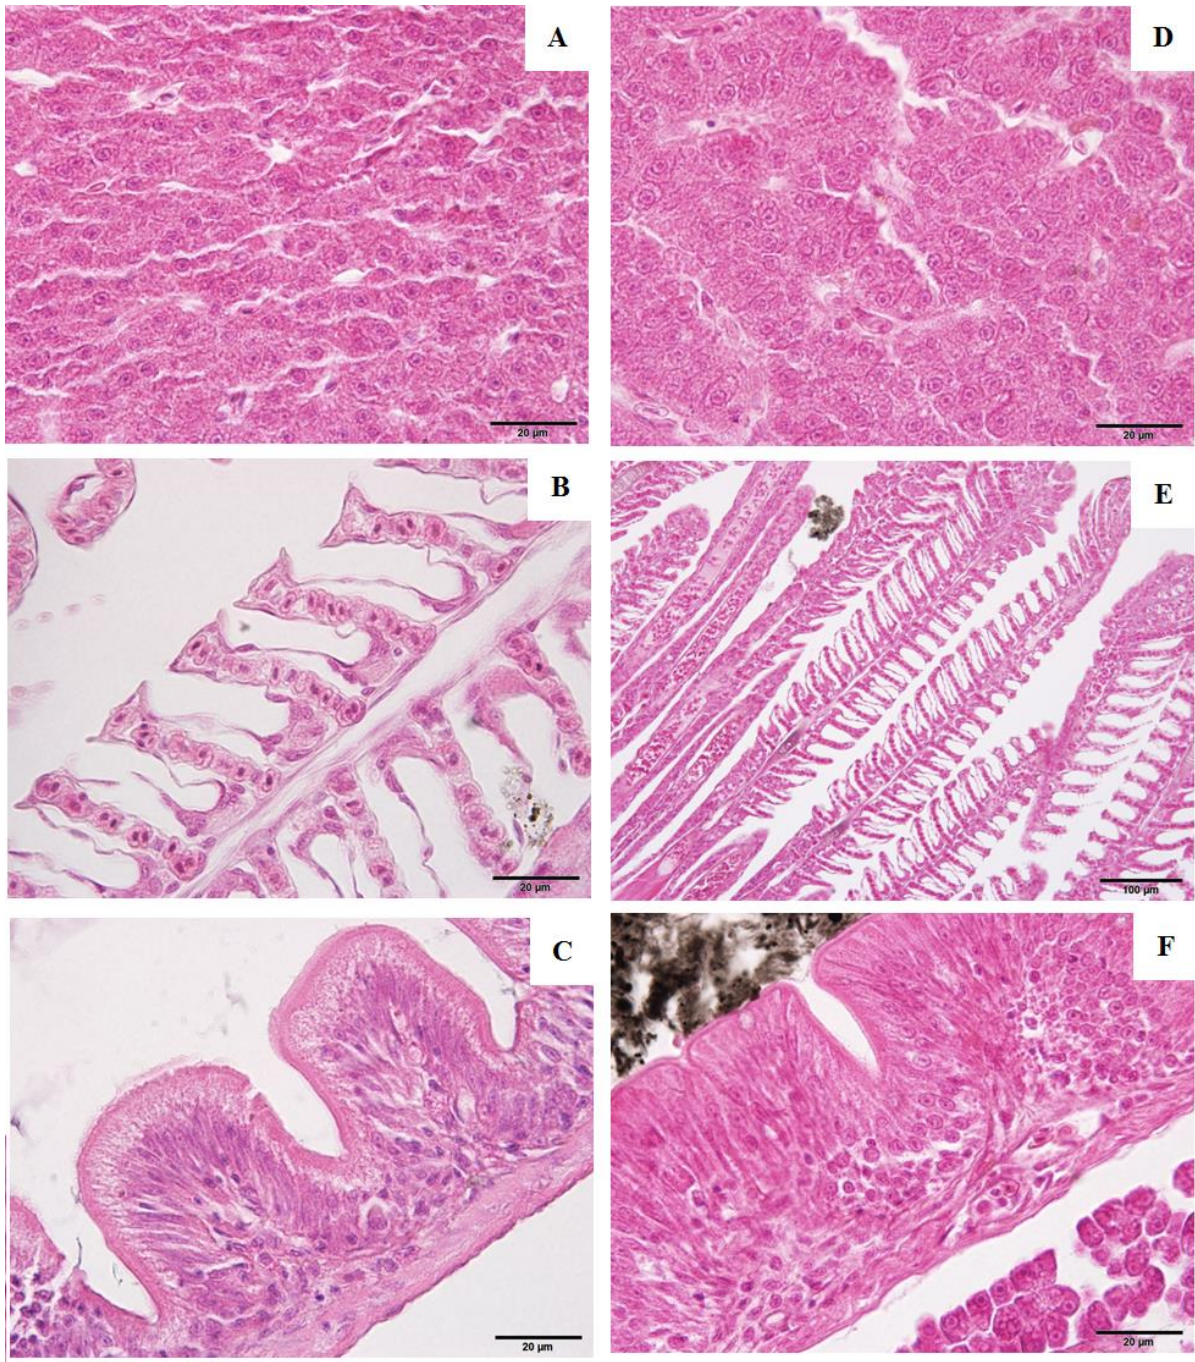

Supplement: f1 [file 485343.f1.pdf]
